# Supplementary material for: Factors Associated with Health-Related Quality of Life Among Colorectal Cancer Survivors
Source: PubMed Central journal article supplement — Am J Prev Med. Author manuscript; Available in PMC 2019 Jan 16. (PMC6334761; doi:10.1016/j.amepre.2015.08.007), 2015-12
Supplement: NIHMS1004967-supplement-Supplement.pdf [file NIHMS1004967-supplement-Supplement.pdf]

**Appendix**  
**Factors Associated With Health-Related Quality of Life Among Colorectal Cancer Survivors**  
**Rodriguez et al.**

**Appendix 1.** Unadjusted Marginal Means for Physical, Mental, and Overall HRQOL by Socio-Demographic, Cancer-Related, and Physical Activity Variables

|                                       | Physical HRQOL T-Score |                  | Mental HRQOL T-Score |                  | EQ-5D HRQOL Score   |                  |
|---------------------------------------|------------------------|------------------|----------------------|------------------|---------------------|------------------|
|                                       | Mean (SE)              | <i>p</i> -value  | Mean (SE)            | <i>p</i> -value  | Mean (SE)           | <i>p</i> -value  |
| <b>Overall mean score</b>             | <b>46.40 (0.29)</b>    |                  | <b>41.78 (0.26)</b>  |                  | <b>0.69 (0.004)</b> |                  |
| <b>Age</b>                            |                        |                  |                      |                  |                     |                  |
| <60                                   | <b>48.33 (0.43)</b>    | <b>&lt;0.001</b> | <b>39.84 (0.44)</b>  | <b>&lt;0.001</b> | <b>0.72 (0.006)</b> | <b>&lt;0.001</b> |
| 60–69                                 | <b>48.10 (0.44)</b>    |                  | <b>40.88 (0.43)</b>  |                  | <b>0.71 (0.006)</b> |                  |
| 70–79                                 | <b>46.78 (0.48)</b>    |                  | <b>41.59 (0.44)</b>  |                  | <b>0.70 (0.007)</b> |                  |
| 80+                                   | <b>44.15 (0.59)</b>    |                  | <b>43.29 (0.50)</b>  |                  | <b>0.65 (0.008)</b> |                  |
| <b>Gender</b>                         |                        |                  |                      |                  |                     |                  |
| Male                                  | 46.81 (0.42)           | 0.174            | 42.08 (0.36)         | 0.273            | 0.69 (0.006)        | 0.083            |
| Female                                | 46.03 (0.39)           |                  | 41.51 (0.36)         |                  | 0.68 (0.006)        |                  |
| <b>Race/ethnicity</b>                 |                        |                  |                      |                  |                     |                  |
| NH white                              | 46.67 (0.39)           | 0.267            | 41.29 (0.33)         | <b>0.021</b>     | 0.69 (0.006)        | 0.390            |
| NH black                              | 45.22 (0.65)           |                  | 42.72 (0.61)         |                  | 0.67 (0.009)        |                  |
| NH other                              | 46.19 (0.61)           |                  | 42.21 (0.66)         |                  | 0.68 (0.009)        |                  |
| Hispanic                              | 45.87 (0.65)           |                  | 43.14 (0.59)         |                  | 0.68 (0.010)        |                  |
| <b>Marital status</b>                 |                        |                  |                      |                  |                     |                  |
| Married/Partnered                     | 46.89 (0.36)           | 0.051            | <b>41.24 (0.33)</b>  | <b>0.008</b>     | <b>0.69 (0.005)</b> | <b>0.047</b>     |
| Single/Divorced/Widowed/Separated     | 45.69 (0.50)           |                  | <b>42.62 (0.40)</b>  |                  | <b>0.68 (0.007)</b> |                  |
| <b>Education</b>                      |                        |                  |                      |                  |                     |                  |
| High school degree or less            | <b>45.48 (0.51)</b>    | <b>0.027</b>     | <b>43.48 (0.45)</b>  | <b>&lt;0.001</b> | <b>0.67 (0.008)</b> | <b>0.001</b>     |
| Some college                          | <b>46.74 (0.50)</b>    |                  | <b>41.22 (0.36)</b>  |                  | <b>0.69 (0.007)</b> |                  |
| College degree or more                | <b>47.37 (0.49)</b>    |                  | <b>40.20 (0.48)</b>  |                  | <b>0.70 (0.007)</b> |                  |
| <b>Employment status</b>              |                        |                  |                      |                  |                     |                  |
| Employed/Self-employed                | <b>48.43 (0.38)</b>    | <b>&lt;0.001</b> | <b>40.47 (0.38)</b>  | <b>0.001</b>     | <b>0.72 (0.005)</b> | <b>&lt;0.001</b> |
| Retired/Not employed for wages        | <b>45.95 (0.36)</b>    |                  | <b>42.12 (0.32)</b>  |                  | <b>0.68 (0.005)</b> |                  |
| <b>Comorbidity</b>                    |                        |                  |                      |                  |                     |                  |
| 0                                     | <b>48.78 (0.48)</b>    | <b>&lt;0.001</b> | <b>40.67 (0.44)</b>  | <b>0.001</b>     | <b>0.73 (0.006)</b> | <b>&lt;0.001</b> |
| 1                                     | <b>47.38 (0.55)</b>    |                  | <b>41.09 (0.47)</b>  |                  | <b>0.70 (0.007)</b> |                  |
| 2+                                    | <b>44.85 (0.40)</b>    |                  | <b>42.67 (0.38)</b>  |                  | <b>0.66 (0.006)</b> |                  |
| <b>Number of treatments received</b>  |                        |                  |                      |                  |                     |                  |
| 0–1                                   | 46.21 (0.44)           | 0.192            | 42.01 (0.40)         | 0.153            | <b>0.68 (0.006)</b> | <b>0.049</b>     |
| 2–3                                   | 46.99 (0.39)           |                  | 41.21 (0.38)         |                  | <b>0.70 (0.006)</b> |                  |
| <b>Currently undergoing treatment</b> |                        |                  |                      |                  |                     |                  |
| Yes                                   | 47.31 (1.10)           | 0.424            | 41.79 (1.05)         | 0.978            | 0.69 (0.017)        | 0.767            |
| No                                    | 46.40 (0.30)           |                  | 41.76 (0.27)         |                  | 0.69 (0.004)        |                  |
| <b>Cancer recurrence</b>              |                        |                  |                      |                  |                     |                  |
| Yes                                   | 45.05 (0.90)           | 0.117            | 41.95 (0.94)         | 0.879            | 0.67 (0.013)        | 0.197            |
| No                                    | 46.54 (0.31)           |                  | 41.80 (0.27)         |                  | 0.69 (0.004)        |                  |
| <b>Multiple primary cancers</b>       |                        |                  |                      |                  |                     |                  |
| Yes                                   | 46.03 (0.74)           | 0.555            | 42.57 (0.58)         | 0.117            | 0.68 (0.010)        | 0.629            |
| No                                    | 46.50 (0.31)           |                  | 41.56 (0.29)         |                  | 0.69 (0.004)        |                  |
| <b>BMI category</b>                   |                        |                  |                      |                  |                     |                  |
| <25                                   | 46.82 (0.44)           | 0.358            | 41.89 (0.45)         | 0.717            | 0.69 (0.007)        | 0.171            |
| 25–29.9                               | 46.47 (0.51)           |                  | 41.55 (0.41)         |                  | 0.69 (0.007)        |                  |
| 30+                                   | 45.69 (0.64)           |                  | 42.08 (0.55)         |                  | 0.67 (0.009)        |                  |
| <b>Minutes of weekly PA</b>           |                        |                  |                      |                  |                     |                  |
| No physical activity                  | <b>44.52 (0.50)</b>    | <b>&lt;0.001</b> | <b>42.98 (0.45)</b>  | <b>0.007</b>     | <b>0.66 (0.007)</b> | <b>&lt;0.001</b> |
| 60 min. or less                       | <b>47.05 (0.83)</b>    |                  | <b>41.91 (0.68)</b>  |                  | <b>0.69 (0.011)</b> |                  |
| 61–149 minutes                        | <b>46.87 (0.73)</b>    |                  | <b>41.42 (0.71)</b>  |                  | <b>0.69 (0.010)</b> |                  |
| 150–249 minutes                       | <b>47.72 (0.64)</b>    |                  | <b>41.04 (0.65)</b>  |                  | <b>0.71 (0.009)</b> |                  |
| 250+ minutes                          | <b>48.40 (0.50)</b>    |                  | <b>40.59 (0.50)</b>  |                  | <b>0.72 (0.006)</b> |                  |
| <b>Minutes of weekly MVPA</b>         |                        |                  |                      |                  |                     |                  |
| No MVPA                               | <b>45.51 (0.39)</b>    | <b>&lt;0.001</b> | <b>42.62 (0.34)</b>  | <b>&lt;0.001</b> | <b>0.67 (0.006)</b> | <b>&lt;0.001</b> |
| 60 min. or less                       | <b>47.49 (0.72)</b>    |                  | <b>41.28 (0.74)</b>  |                  | <b>0.70 (0.011)</b> |                  |
| 61–149 minutes                        | <b>47.46 (0.81)</b>    |                  | <b>39.71 (0.72)</b>  |                  | <b>0.71 (0.010)</b> |                  |
| 150+ minutes                          | <b>48.37 (0.54)</b>    |                  | <b>40.59 (0.57)</b>  |                  | <b>0.72 (0.007)</b> |                  |

*Note:* Estimated marginal means are weighted and incorporate design and post-stratification adjustments. Boldface indicates statistical significance ( $p < 0.05$ ) for associations with each outcome based on Wald F-tests from unadjusted linear regression models.

PA, physical activity; MVPA, moderate to vigorous physical activity; HRQOL, health-related quality of life
